# Supplementary material for: Precise molecular design for BN-modified polycyclic aromatic hydrocarbons toward mechanochromic materials
Source: Royal Society of Chemistry journal article supplement (doi:10.1039/d0ta06191c), 2020-01-01

## Supporting Information

### Precise Molecular Design for B-N Modified Polycyclic Aromatic Hydrocarbon Toward Mechanochromic Material

Huanan Huang<sup>\*a</sup>, Ying Zhou<sup>a</sup>, Yawei Wang<sup>a</sup>, Xiaohua Cao<sup>a</sup>, Chuan Han<sup>a</sup>, Guochang Liu<sup>a</sup>, Zhixiong Xu<sup>a</sup>, Changchao Zhan<sup>a</sup>, Huanan Hu<sup>a</sup>, You Peng<sup>a</sup>, Ping Yan<sup>a</sup>, Dapeng Cao<sup>\*b</sup>

- a. School of Chemistry and Environmental Engineering; Jiangxi Province Engineering Research Center of Ecological Chemical Industry; Jiujiang Key Laboratory of Organosilicon Chemistry and Application, Jiujiang University, Jiujiang 332005, China.
- b. State Key Laboratory of Organic-Inorganic Composites, Beijing University of Chemical Technology, Beijing, 100029, China

### Contents

|                                                            |     |
|------------------------------------------------------------|-----|
| 1. General Information.....                                | S2  |
| 2. Procedure for the Synthesis of Compounds 1-4.....       | S3  |
| 3. General Procedure for the Synthesis of Compound 5.....  | S3  |
| 4. General Procedure for the Synthesis of Compound 6.....  | S3  |
| 5. Characterization Data for the New Compounds .....       | S4  |
| 6. TGA Studies of Compound 5.....                          | S5  |
| 7. UV-Vis and FL Studies of Compound 5.....                | S5  |
| 8. X-ray Crystallographic Studies of Compound 5 and 6..... | S9  |
| 9. DFT Calculations.....                                   | S10 |
| 10. Reference.....                                         | S17 |
| 11. Scanned NMR Spectra for the New Compounds.....         | S18 |

**General Information.** All operations involving air- and moisture-sensitive compounds were carried out under an atmosphere of dry argon by using a modified Schlenk line. All solvents were freshly distilled from Na or P<sub>2</sub>O<sub>5</sub>. The <sup>1</sup>H, <sup>13</sup>C, <sup>11</sup>B spectra were recorded on a 400 MHz NMR spectrometer. Chemical shifts are referenced against external BF<sub>3</sub>·Et<sub>2</sub>O (<sup>11</sup>B) and tetramethylsilane (TMS). High-resolution mass spectra (HRMS) were obtained on a Varian QFT-ESI spectrometer. The UV-vis spectra were recorded on a RAYLEIGH UV-2100 spectrometer. Fluorescence spectra were performed on F-7000 FL fluorescence spectrophotometer. Solid-state Fluorescence spectra were performed on Edinburgh Instruments FS5 fluorescence spectrophotometer. Thermal gravimetric analysis (TGA) was recorded on a Labsyseo system (SETRAM, France) under nitrogen atmosphere at a heating rate of 10°C/min from 25°C to 800°C. The temperature of degradation (T<sub>d</sub>) was correlated to a 5% weight. The X-ray diffraction (XRD) patterns were examined on a Bruker D8 Focus diffractometer (Bruker, Germany). Incident X-ray radiation is Cu Kα<sub>1</sub> radiation (λ=1.5405 Å) and Cu Kα<sub>2</sub> radiation (λ=1.5444 Å). The typical step size for signal collection is 0.01° with duration of 0.1 s at each step. Microstructures of sample powders were analyzed using a field emission scanning electron microscope (SEM, Hitachi S4800, Japan). Cyclic voltammetry (CV) experiments were performed in dichloromethane solutions. All measurements were carried out at room temperature with a conventional three-electrode (the working electrode: glassy carbon electrode, the reference electrode: saturated calomel electrode (SCE), and a Pt wire as the counter electrode). Ferrocene/ferrocenium redox couple (Fc/Fc<sup>+</sup>) was used as an internal reference for all measurements. The commercially available compound **5'** was purchased from Sigma-Aldrich. A suitable crystal was selected and on a SuperNova, Dual, Cu at zero, AtlasS2 diffractometer. The crystal was kept at 100.00(10) K during data collection using graphite-monochromated CuKα radiation (λ = 1.54184Å). CCDC numbers: 2004086 (for compound **5**), 2004088 (for compound **6**). The structures were solved by use of SHELXTL program<sup>S1</sup>. Refinements were performed on *F*<sup>2</sup> anisotropically for all the non-hydrogen atoms by the full-matrix least-squares method.

**DFT calculation:** Theoretical calculations were performed using the ORCA program packages<sup>S2</sup>. The geometries were optimized at the B3LYP/def2-SVP level. Time-dependent TD-DFT with PBE0 function and basis set def2-TZVPD were then performed to further analyze the dipole moment with the optimized structure<sup>S3</sup>. The electrostatic potential surface maps (ESP) of molecular for **5** and **5'** were obtained by DFT at B3LYP level. Ground state geometries of **5** and **5'** were directly selected from single crystal structures and were used as molecular models with restricted optimization. On the basis of this, the excited energies in singlet (S<sub>n</sub>) and triplet states (T<sub>n</sub>) were estimated through a combination of TD-DFT and B3LYP at the 6-311+G(p, d) level. Based on the results of theoretical calculation to elucidate the mechanisms of possible singlet-triplet intersystem crossings, in which the channels from S<sub>1</sub> to T<sub>n</sub> are believed to share part of the same transition orbital compositions. Herein, energy

levels of the possible  $T_n$  states are considered to lie within the range of  $ES_1 \pm 0.3$  eV.

### Procedures for the Synthesis of Compounds 1-4

The compounds **1-4** were synthesized according to the previous works [S4].

### General Procedure for the Synthesis of Compound 5

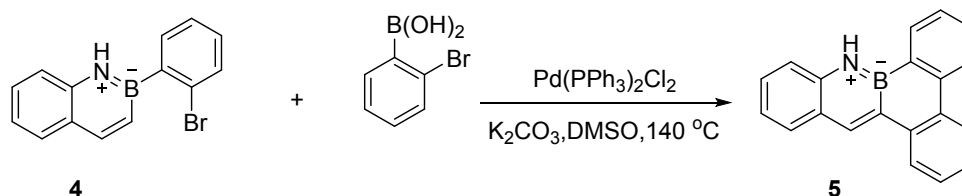

To a dried Schlenk flask, sealed with schlenk system, evacuated under vacuum, and purged with  $\text{N}_2$  three times, charged with **4** (283 mg, 1 mmol), (2-bromophenyl)boronic acid (600 mg, 3 mmol),  $\text{Pd(PPh}_3)_2\text{Cl}_2$  (70 mg, 10 mol %), DMSO 2 mL. The mixture was heated and stirred at  $140^\circ\text{C}$  for 18 h. The resulting mixture was successively washed with water (100 mL) and extracted twice with  $\text{CH}_2\text{Cl}_2$  (60 mL). The combined organic layers were dried over  $\text{Na}_2\text{SO}_4$ . **5** was obtained as white powder (78%) by silica gel chromatography.

### General Procedure for the Synthesis of Compound 6

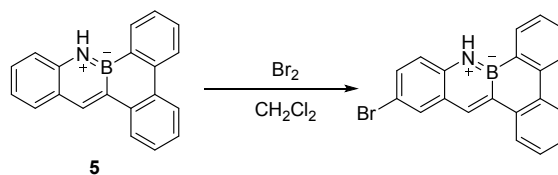

To a cooled solution ( $0^\circ\text{C}$ ) of **5** (142 mg, 0.50 mmol) in  $\text{CH}_2\text{Cl}_2$  (5 mL) was slowly added a solution of bromine (1M in  $\text{CH}_2\text{Cl}_2$ , 1.1 equivalents) diluted with  $\text{CH}_2\text{Cl}_2$  (5 mL). After the addition, the mixture was stirred at  $0^\circ\text{C}$  for 30 min, and then at room temperature for 2 h. The resulting mixture was evaporated to dryness to give the crude product, which was purified by flash column chromatography.

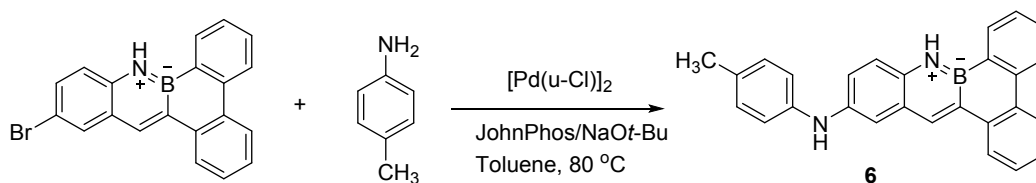

To an oven-dried schlenk tube with a stir bar was added **2** (0.5 mmol, 1 equiv) and p-toluidine (0.6 mmol, 1.2 equiv),  $\text{Pd}(\mu\text{-Cl})$  dimer (0.005 mmol, 1 mol %), JohnPhos (0.01 mmol, 2 mol%), and  $\text{NaOt-Bu}$  (0.7 mmol, 1.4 equiv). The tube was sealed with schlenk system, evacuated under vacuum, and purged with  $\text{N}_2$  three times. Toluene (4 mL) was added; the resulting mixture was heated to  $80^\circ\text{C}$  and stirred 18 h. The reaction mixture was cooled to rt, and filtered over Celite. The solvent was removed in vacuo, and the product was purified by flash column chromatography on silica gel with hexanes and dichloromethane as the eluent.

## Characterization Data for the New Compounds Reported in the Paper

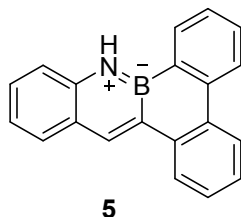

### 10H-benzo[e]dibenzo[3,4:5,6]borinino[1,2-b][1,2]azaborinine (**5**).

**5** was obtained as white solid (78%). <sup>1</sup>H NMR (400 MHz, CDCl<sub>3</sub>): δ 8.99 (1H, s), 8.71 (1H, s, *NH*), 8.26-8.53 (3H, m), 8.25 (1H, d, *J* = 4 Hz), 7.92 (1H, d, *J* = 4 Hz), 7.58-7.69(1H, m) 7.48-7.56(4H, m), 7.30-7.33 (1H, m). <sup>11</sup>B NMR (128 MHz, CDCl<sub>3</sub>): δ 29.74. <sup>13</sup>C NMR (101 MHz, CDCl<sub>3</sub>): δ 141.31 (s, quaternary-C), 139.54, 136.91, 133.93 (s, quaternary-C), 133.37 (s, quaternary-C), 130.64 (s), 130.33, 129.83, 128.66, 127.16, 127.13, 126.14, 125.55(s, quaternary-C), 124.97, 124.15, 122.99, 121.18, 118.19. HR-MS (ESI): calcd. for [M]<sup>+</sup>: 279.1219, found: 279.1181. The carbons attaching to boron were not observed.

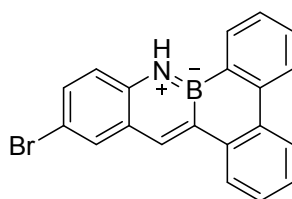

### 13-bromo-10H-benzo[e]dibenzo[3,4:5,6]borinino[1,2-b][1,2]azaborinine

<sup>1</sup>H NMR (400 MHz, CDCl<sub>3</sub>): δ 8.77 (1H, s), 8.58 (1H, s, *NH*), 8.40-8.46(3H, m), 8.16 (1H, d, *J* = 8 Hz), 7.98 (1H, d, *J* = 4 Hz), 7.65-7.71(1H, m) 7.48-7.59(4H, m), 7.34-7.37 (1H, m). <sup>13</sup>C NMR (101 MHz, CDCl<sub>3</sub>): δ 141.34 (s, quaternary-C), 138.99(s, quaternary-C), 138.17, 137.56(s, quaternary-C), 135.49(s, quaternary-C), 133.60, 133.42, 132.18, 131.31, 130.93, 129.85, 127.64, 127.23, 127.00(s, quaternary-C), 126.28, 125.03, 124.23, 123.10, 119.73, 113.57(s, quaternary-C). HR-MS (ESI): calcd. for [M]<sup>+</sup>: 357.0324, found: 357.0276. The carbons attaching to boron were not observed.

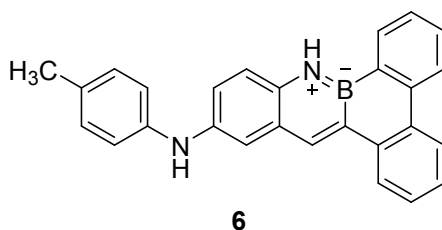

**N-(p-tolyl)-10H-benzo[e]dibenzo[3,4:5,6]borinino[1,2-b][1,2]azaborinin-13-amine(6)** was obtained as yellow solid (43%). <sup>1</sup>H NMR (400 MHz, CDCl<sub>3</sub>): δ 8.83 (1H, s), 8.61 (1H, s, *B-NH*), 8.44-8.49 (3H, m), 8.21 (1H, d, *J* = 8 Hz), 7.64-7.70 (1H, m), 7.41-7.53(5H, m) 7.26-7.30(1H, m), 6.99-7.12 (4H, m), 5.6(1H, *NH*), 2.32(s, 3H, CH<sub>3</sub>). <sup>13</sup>C NMR (101 MHz, CDCl<sub>3</sub>): δ 141.11 (s, quaternary-C, overlap), 136.22(s, overlap), 133.95(s, quaternary-C, overlap), 133.44(s, quaternary-C, overlap), 130.43,

129.97, 129.74, 127.16, 127.09, 126.23(s, quaternary-C), 126.13, 124.99, 124.14, 123.01, 122.14, 119.01, 117.93, 117.67, 20.68. The carbons attaching to boron were not observed.

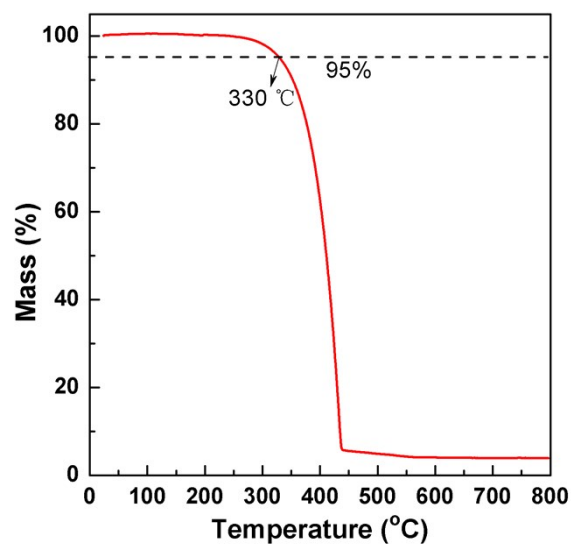

**Figure S1.** TGA graph of **5** (heating rate: 10°C/min under nitrogen flushing)

### UV-Vis and FL Studies of Compound **5**

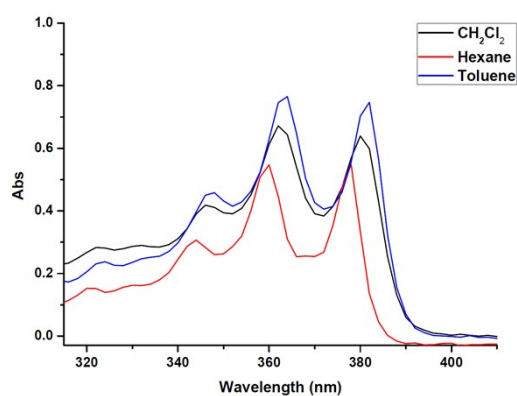

**Figure S2.** UV-vis spectra of **5** in CH<sub>2</sub>Cl<sub>2</sub>, n-hexane and toluene, respectively.

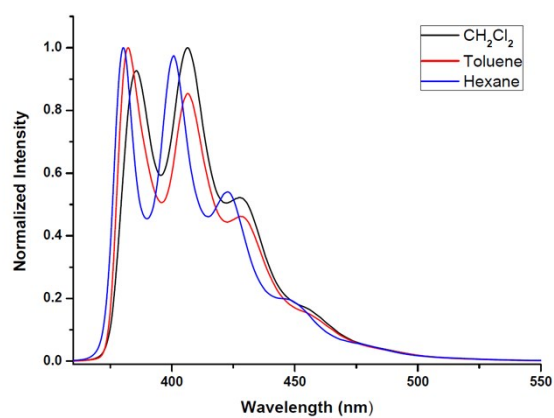

**Figure S3.** Normalized fluorescence emission spectra of **5** in CH<sub>2</sub>Cl<sub>2</sub>, n-hexane and toluene, respectively. All experiments upon excitation at the absorption maximum wavelengths.

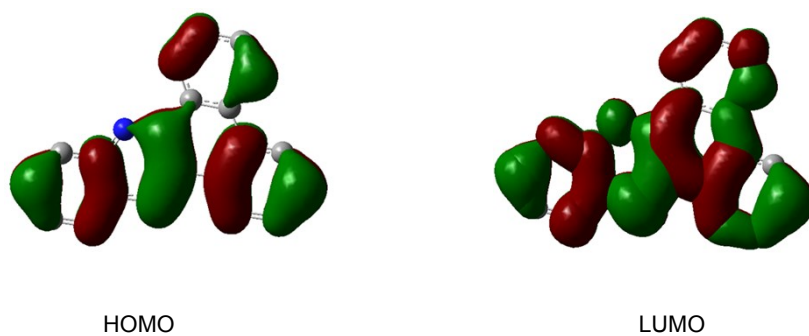

**Figure S4.** The Calculated Frontier Orbitals of **5**

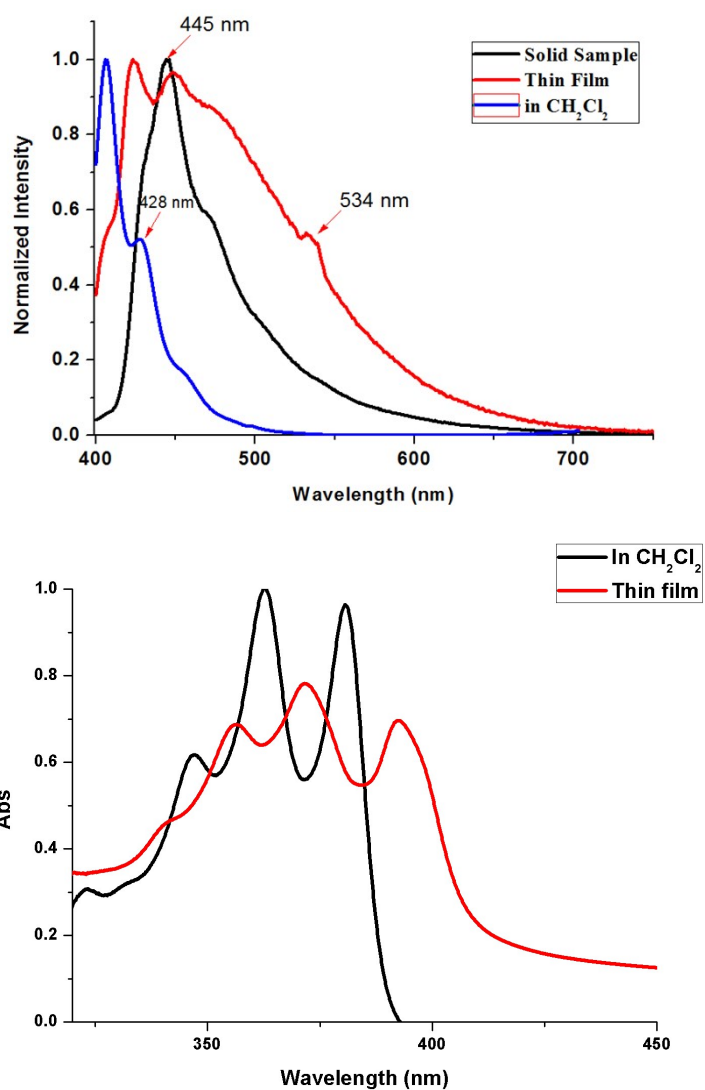

**Figure S5.** Up: Normalized fluorescence of **5** in different solid states, in  $\text{CH}_2\text{Cl}_2$ (blue line); solid powder (black line); thin film deposited via spin coating (red line); Down: Absorption of compound **5** solved in  $\text{CH}_2\text{Cl}_2$  (black line), as thin film deposited via spin coating (red line).

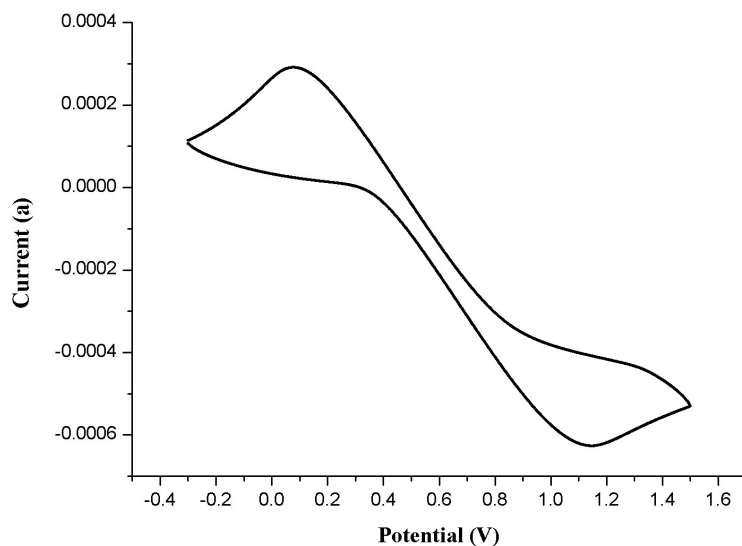

*Figure S6.* Cyclic voltammograms of Ferrocene measured in CH<sub>2</sub>Cl<sub>2</sub> solution

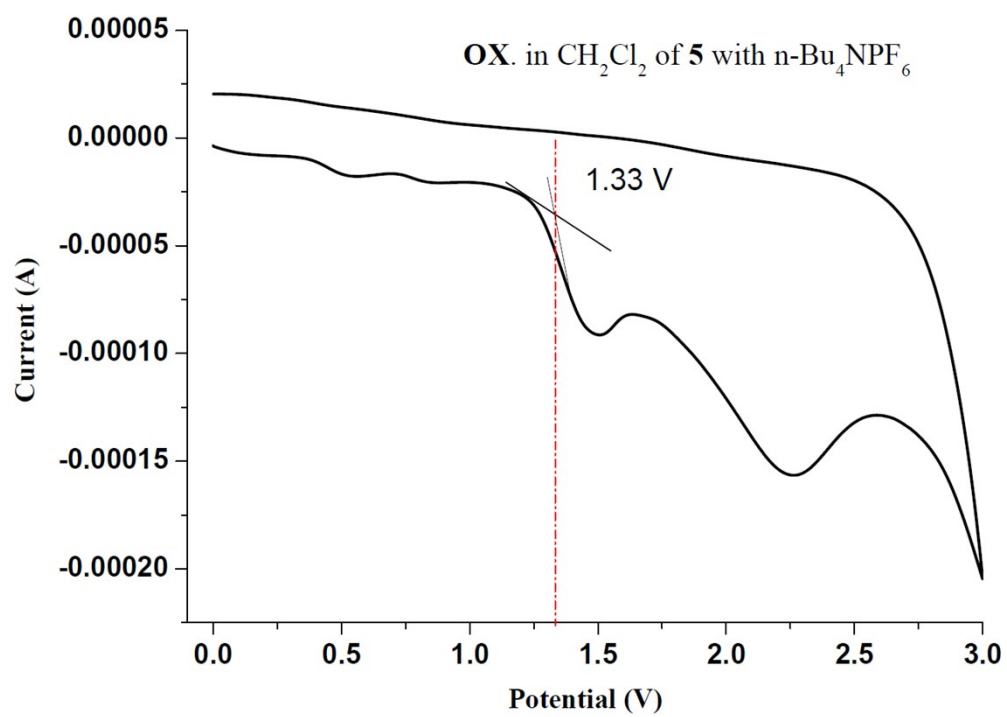

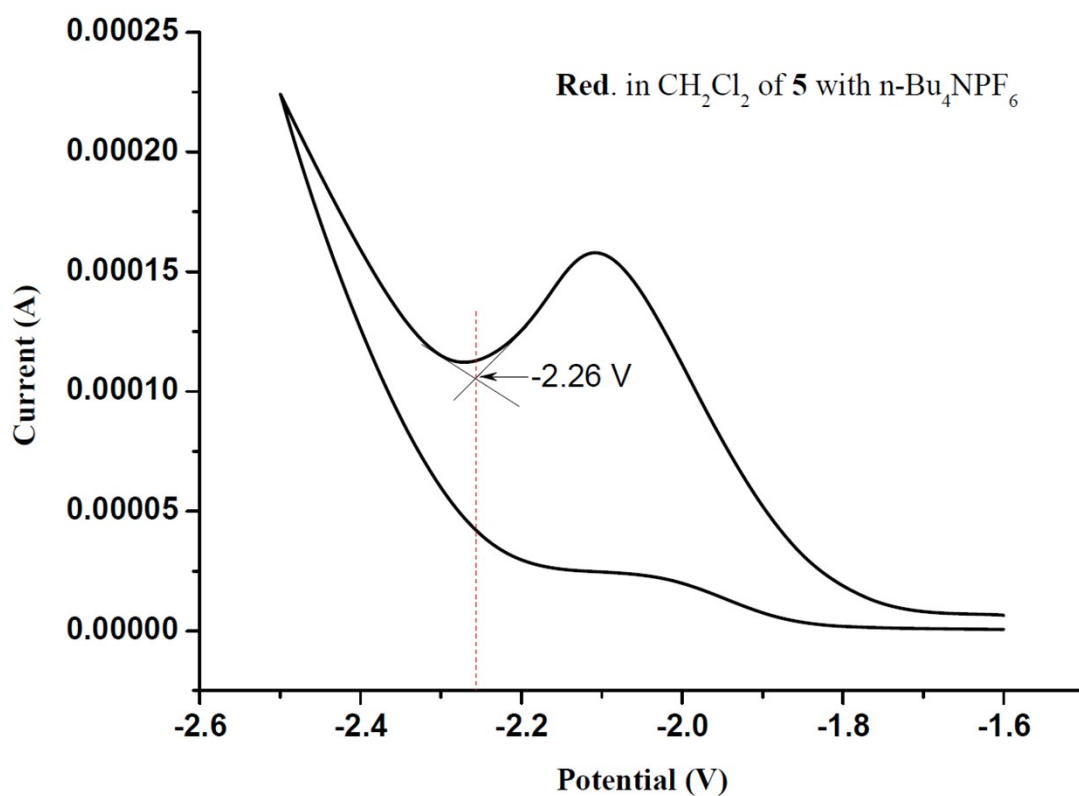

**Figure S7.** Cyclic voltammograms of 5 mM **5** measured in  $\text{CH}_2\text{Cl}_2$  solution, containing 0.1 M TBAPF<sub>6</sub> as the supporting electrolyte at room temperature. Ferrocene/ferrocenium redox couple ( $\text{Fc}/\text{Fc}^+$ ) was used as an internal reference and the scan rate at  $100 \text{ mVs}^{-1}$ .

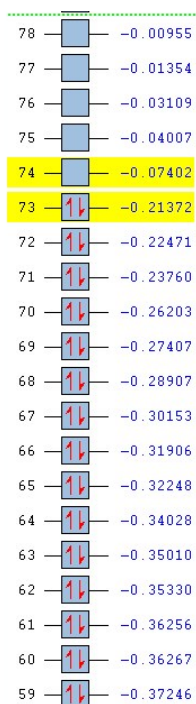

**Figure S8.** Calculated frontline orbital energy for **5**



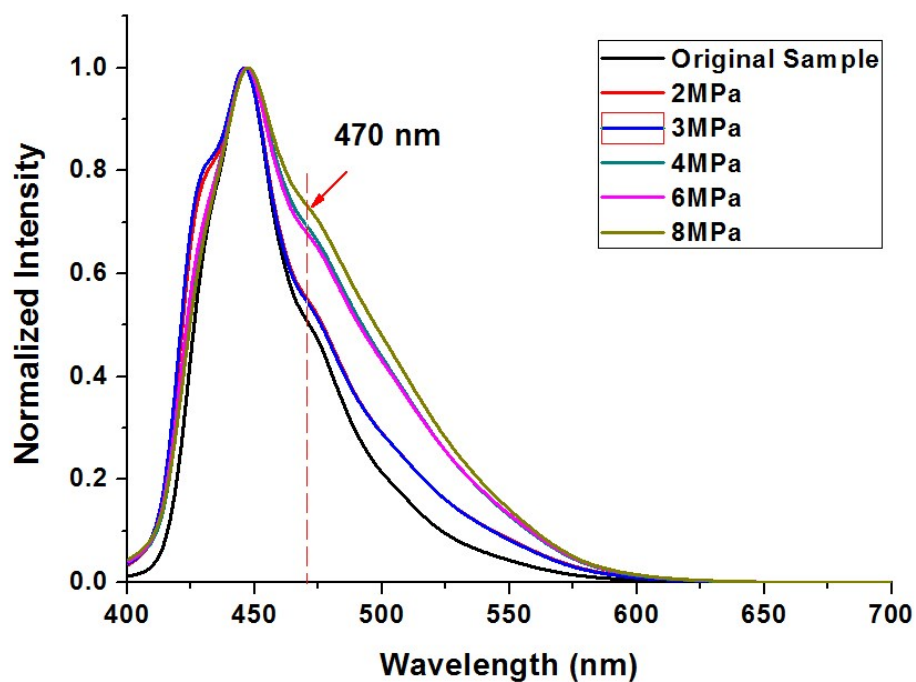

**Figure S9.** Quantitative experiments: The emission spectra of **5** obtained at different pressures

### X-ray Crystallographic Studies of Compounds **5** and **6**

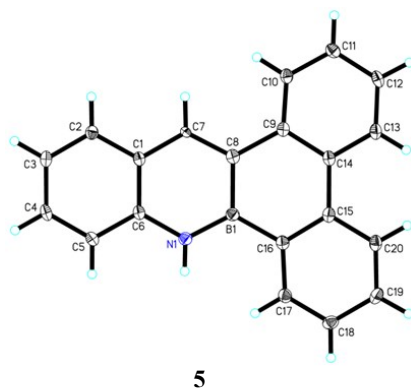

**Figure 10.** Molecule structure of **5**. Selected bond lengths (Å) and bond angles for **5**: B1-N1: 1.402(3), B1-C8: 1.527(3), C6-N1: 1.403(2), N1-B1-C8: 117.58(18)°, N1-B1-C16: 123.29(18)°, C16-B1-C8: 119.06(17)°.

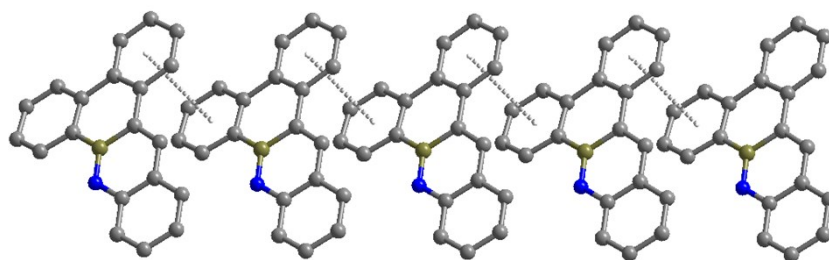

**Figure S11.** The  $\pi$ - $\pi$  interactions between molecules along the b axis

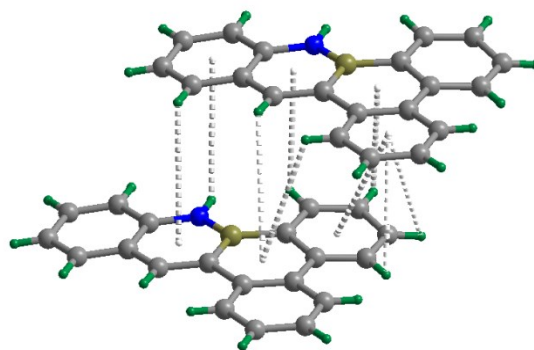

**Figure S12.** Intermolecular interactions of crystal **5**

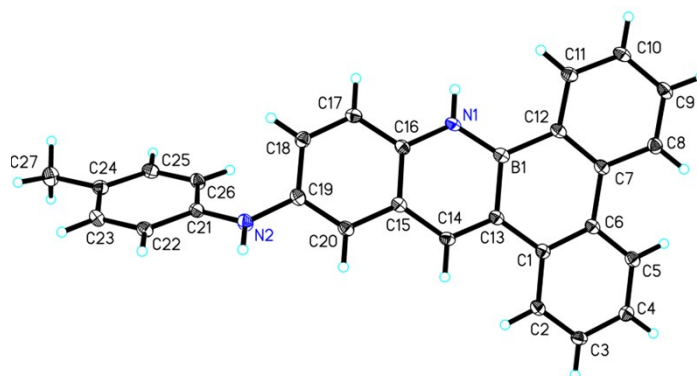

**Figure S13.** Molecular structure of **6**

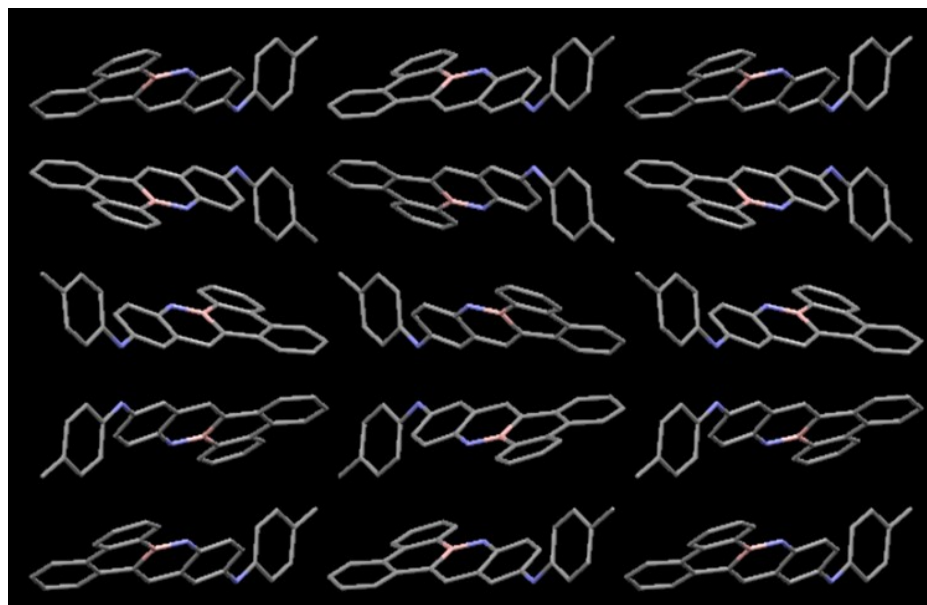

**Figure S14.** The stacking patterns of the referential compound **6**

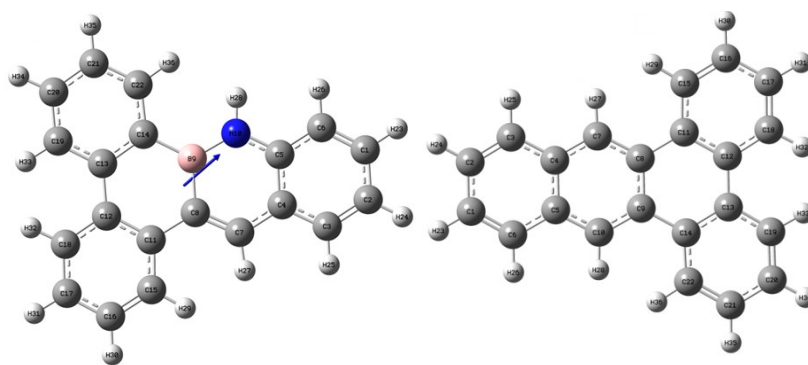

Figure S15. The dipole moment of **5** (left) and **5'** (right)

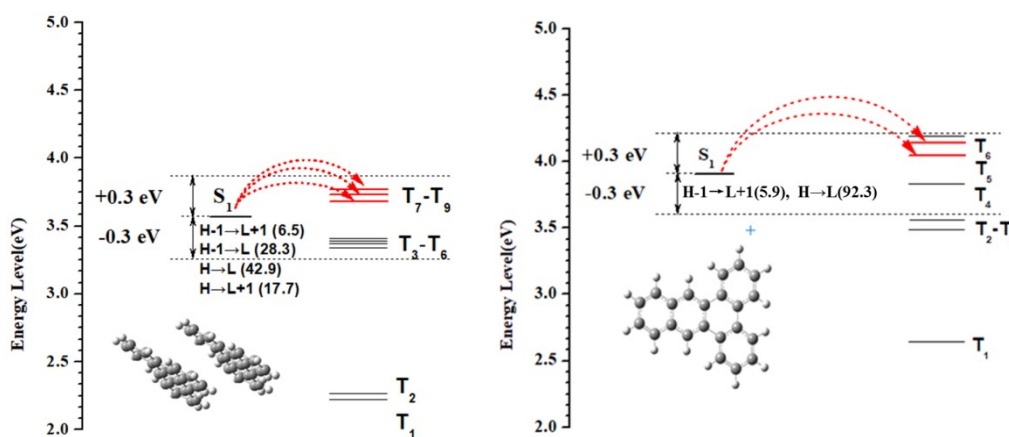

Figure S16. Energy level diagrams and possible ISC channels from excited singlet state ( $S_1$ ) to excited triplet states ( $T_n$ ) for the **5'** (left: dimer, right: isolate)

Table S1. Crystallographic data and structure refinement details for **5**.

| <b>5</b>                        |                                                                                                                                                                                             |
|---------------------------------|---------------------------------------------------------------------------------------------------------------------------------------------------------------------------------------------|
| Empirical formula               | $C_{20}H_{14}BN$                                                                                                                                                                            |
| Formula weight                  | 279.13                                                                                                                                                                                      |
| Temperature                     | 100.00(10)                                                                                                                                                                                  |
| Radiation                       | $CuK\alpha$ ( $\lambda = 1.54184$ )                                                                                                                                                         |
| Crystal system, space group     | monoclinic, $C2/c$                                                                                                                                                                          |
| Unit cell dimensions            | $a = 20.7768(7) \text{ \AA}$<br>$b = 5.8224(2) \text{ \AA}$<br>$c = 24.2057(9) \text{ \AA}$<br>$\alpha = 90 \text{ deg.}$<br>$\beta = 110.115(4) \text{ deg.}$<br>$\gamma = 90 \text{ deg}$ |
| Volume                          | $2749.58(18) \text{ \AA}^3$                                                                                                                                                                 |
| Z, Calculated density           | 8, $1.349 \text{ g/m}^3$                                                                                                                                                                    |
| Absorption coefficient          | $0.588 \text{ mm}^{-1}$                                                                                                                                                                     |
| $F(000)$                        | 1168.0                                                                                                                                                                                      |
| Crystal size                    | $0.15 \times 0.13 \times 0.12 \text{ mm}$                                                                                                                                                   |
| Theta range for data collection | $7.78$ to $147.068 \text{ deg}$                                                                                                                                                             |
| Limiting indices                | $-25 \leq h \leq 20, -7 \leq k \leq 5, -29 \leq l \leq 27$                                                                                                                                  |
| Reflections collected           | 4684                                                                                                                                                                                        |
| Independent reflections         | 2652 [Rint = 0.0198, Rsigma = 0.0224]                                                                                                                                                       |

|                                             |                                                   |
|---------------------------------------------|---------------------------------------------------|
| Data/restraints/parameters                  | 2652/0/193                                        |
| Goodness-of-fit on F <sup>2</sup>           | 1.069                                             |
| Final R indexes [ $I \geq 2\sigma(I)$ ]     | R <sub>1</sub> = 0.0616, wR <sub>2</sub> = 0.1760 |
| Final R indexes [all data]                  | R <sub>1</sub> = 0.0650, wR <sub>2</sub> = 0.1792 |
| Largest diff. peak/hole / e Å <sup>-3</sup> | 0.69/-0.65                                        |

**Table S2.** Crystallographic data and structure refinement details for **6**.

| <b>6</b>                                    |                                                                                                     |
|---------------------------------------------|-----------------------------------------------------------------------------------------------------|
| Empirical formula                           | C <sub>27</sub> H <sub>21</sub> BN <sub>2</sub>                                                     |
| Formula weight                              | 384.27                                                                                              |
| Temperature                                 | 100.00(10)                                                                                          |
| Radiation                                   | CuKα (λ = 1.54184)                                                                                  |
| Crystal system, space group                 | orthorhombic, C2/c                                                                                  |
| Unit cell dimensions                        | a = 18.5896(5) Å<br>b = 8.4699(2) Å<br>c = 24.5627(7) Å<br>α = 90 deg.<br>β = 90 deg.<br>γ = 90 deg |
| Volume                                      | 3867.45(18) Å <sup>3</sup>                                                                          |
| Z, Calculated density                       | 8, 1.32 g/m <sup>3</sup>                                                                            |
| Absorption coefficient                      | 0.585 mm <sup>-1</sup>                                                                              |
| F(000)                                      | 1616.0                                                                                              |
| Crystal size                                | 0.13 × 0.12 × 0.11 mm                                                                               |
| Theta range for data collection             | 7.198 to 147.306 deg                                                                                |
| Limiting indices                            | -22 ≤ h ≤ 22, -10 ≤ k ≤ 8, -27 ≤ l ≤ 29                                                             |
| Reflections collected                       | 9720                                                                                                |
| Independent reflections                     | 3806 [Rint = 0.0408, Rsigma = 0.0444]                                                               |
| Data/restraints/parameters                  | 3806/0/272                                                                                          |
| Goodness-of-fit on F <sup>2</sup>           | 1.027                                                                                               |
| Final R indexes [ $I \geq 2\sigma(I)$ ]     | R <sub>1</sub> = 0.0526, wR <sub>2</sub> = 0.1283                                                   |
| Final R indexes [all data]                  | R <sub>1</sub> = 0.0725, wR <sub>2</sub> = 0.1437                                                   |
| Largest diff. peak/hole / e Å <sup>-3</sup> | 0.29/-0.32                                                                                          |

**Table S3.** Cartesian coordinates for **5**

| Center | Atomic | Atomic | Coordinates (Angstroms) |           |           |
|--------|--------|--------|-------------------------|-----------|-----------|
| Number | Number | Type   | X                       | Y         | Z         |
| 1      | 6      | 0      | 5.165053                | 0.714678  | 0.000093  |
| 2      | 6      | 0      | 5.171583                | -0.693062 | -0.000247 |
| 3      | 6      | 0      | 3.972935                | -1.382485 | -0.000378 |
| 4      | 6      | 0      | 2.731043                | -0.705316 | -0.000179 |
| 5      | 6      | 0      | 2.741807                | 0.718689  | 0.000153  |
| 6      | 6      | 0      | 3.968086                | 1.411138  | 0.000291  |
| 7      | 6      | 0      | 1.486548                | -1.417159 | -0.000273 |

|    |   |   |           |           |           |
|----|---|---|-----------|-----------|-----------|
| 8  | 6 | 0 | 0.263444  | -0.789522 | -0.000029 |
| 9  | 5 | 0 | 0.261411  | 0.739915  | 0.000215  |
| 10 | 7 | 0 | 1.535398  | 1.385567  | 0.000319  |
| 11 | 6 | 0 | -1.029640 | -1.491170 | 0.000017  |
| 12 | 6 | 0 | -2.252086 | -0.749676 | -0.000006 |
| 13 | 6 | 0 | -2.283050 | 0.740960  | -0.000062 |
| 14 | 6 | 0 | -1.080767 | 1.501966  | 0.000139  |
| 15 | 6 | 0 | -1.093950 | -2.899891 | 0.000142  |
| 16 | 6 | 0 | -2.296025 | -3.588807 | 0.000190  |
| 17 | 6 | 0 | -3.493028 | -2.868106 | 0.000149  |
| 18 | 6 | 0 | -3.458660 | -1.481293 | 0.000074  |
| 19 | 6 | 0 | -3.506518 | 1.445319  | -0.000310 |
| 20 | 6 | 0 | -3.552302 | 2.833786  | -0.000307 |
| 21 | 6 | 0 | -2.370718 | 3.581388  | -0.000076 |
| 22 | 6 | 0 | -1.157779 | 2.906822  | 0.000126  |
| 23 | 1 | 0 | 6.104006  | 1.261387  | 0.000196  |
| 24 | 1 | 0 | 6.113980  | -1.232668 | -0.000394 |
| 25 | 1 | 0 | 3.967252  | -2.470040 | -0.000629 |
| 26 | 1 | 0 | 3.963306  | 2.499280  | 0.000555  |
| 27 | 1 | 0 | 1.574060  | -2.503140 | -0.000572 |
| 28 | 1 | 0 | 1.610356  | 2.396738  | 0.000494  |
| 29 | 1 | 0 | -0.172354 | -3.472571 | 0.000264  |
| 30 | 1 | 0 | -2.303085 | -4.675479 | 0.000299  |
| 31 | 1 | 0 | -4.449153 | -3.384466 | 0.000189  |
| 32 | 1 | 0 | -4.407944 | -0.959999 | 0.000108  |
| 33 | 1 | 0 | -4.451638 | 0.915878  | -0.000525 |
| 34 | 1 | 0 | -4.516321 | 3.336205  | -0.000493 |
| 35 | 1 | 0 | -2.403308 | 4.667577  | -0.000093 |
| 36 | 1 | 0 | -0.239851 | 3.493197  | 0.000232  |

**Table S4.** Cartesian coordinates for 5'

| Center | Atomic | Atomic | Coordinates (Angstroms) |           |           |
|--------|--------|--------|-------------------------|-----------|-----------|
| Number | Number | Type   | X                       | Y         | Z         |
| 1      | 6      | 0      | -5.138536               | -0.711202 | 0.000013  |
| 2      | 6      | 0      | -5.138577               | 0.710656  | 0.000157  |
| 3      | 6      | 0      | -3.953314               | 1.405471  | 0.000196  |
| 4      | 6      | 0      | -2.707063               | 0.715566  | 0.000085  |
| 5      | 6      | 0      | -2.707016               | -0.715961 | -0.000055 |
| 6      | 6      | 0      | -3.953223               | -1.405943 | -0.000086 |
| 7      | 6      | 0      | -1.470364               | 1.386171  | 0.000113  |
| 8      | 6      | 0      | -0.248079               | 0.719962  | -0.000018 |
| 9      | 6      | 0      | -0.247944               | -0.720310 | -0.000115 |
| 10     | 6      | 0      | -1.470273               | -1.386532 | -0.000130 |
| 11     | 6      | 0      | 1.029467                | 1.449215  | -0.000043 |
| 12     | 6      | 0      | 2.257407                | 0.735789  | 0.000084  |
| 13     | 6      | 0      | 2.257635                | -0.735472 | 0.000125  |
| 14     | 6      | 0      | 1.029894                | -1.449306 | -0.000108 |
| 15     | 6      | 0      | 1.071382                | 2.860389  | -0.000212 |
| 16     | 6      | 0      | 2.266232                | 3.559334  | -0.000202 |
| 17     | 6      | 0      | 3.476477                | 2.856637  | -0.000041 |
| 18     | 6      | 0      | 3.462134                | 1.472257  | 0.000083  |
| 19     | 6      | 0      | 3.462648                | -1.471489 | 0.000331  |
| 20     | 6      | 0      | 3.477542                | -2.855845 | 0.000218  |
| 21     | 6      | 0      | 2.267570                | -3.558989 | -0.000123 |
| 22     | 6      | 0      | 1.072452                | -2.860508 | -0.000273 |
| 23     | 1      | 0      | -6.084398               | -1.246066 | -0.000017 |
| 24     | 1      | 0      | -6.084471               | 1.245465  | 0.000235  |
| 25     | 1      | 0      | -3.949357               | 2.493117  | 0.000307  |
| 26     | 1      | 0      | -3.949193               | -2.493587 | -0.000190 |
| 27     | 1      | 0      | -1.503393               | 2.469903  | 0.000281  |
| 28     | 1      | 0      | -1.503383               | -2.470225 | -0.000157 |
| 29     | 1      | 0      | 0.149188                | 3.429059  | -0.000392 |
| 30     | 1      | 0      | 2.258931                | 4.645805  | -0.000340 |

|    |   |   |          |           |           |
|----|---|---|----------|-----------|-----------|
| 31 | 1 | 0 | 4.423563 | 3.389086  | -0.000045 |
| 32 | 1 | 0 | 4.413689 | 0.954602  | 0.000146  |
| 33 | 1 | 0 | 4.414010 | -0.953476 | 0.000602  |
| 34 | 1 | 0 | 4.424832 | -3.387929 | 0.000381  |
| 35 | 1 | 0 | 2.260703 | -4.645463 | -0.000261 |
| 36 | 1 | 0 | 0.150581 | -3.429638 | -0.000529 |

**Table S5.** The singlet and triplet excited state transition configurations of isolated **5** revealed by TD-DFT calculations. The matched excited states that contain the same orbital transition components of  $S_1$  and  $|S_1-T_n| < 0.3$  eV were highlighted in red.

| <b>5</b> (Isolated) | n-th | Energy (eV) | Transition configuration (%)                                                                                                                             |
|---------------------|------|-------------|----------------------------------------------------------------------------------------------------------------------------------------------------------|
| $S_n$               | 1    | 3.8025      | H-1→L+2(2.3), H→L(93.6)                                                                                                                                  |
| $T_n$               | 1    | 2.6843      | H-2→L (2.5), H→L(85.9)                                                                                                                                   |
|                     | 2    | 3.3199      | H-2→L(4.9), H-2→L+1(4.6), H-1→L(66.3), H-1→L+1(7.0), H→L(4.6)                                                                                            |
|                     | 3    | 3.6340      | H-3→L (5.7), H-2→L (47.8), H-2→L+1 (2.1), H-2→L+3 (2.9), H-1→L+1(16.8), H-1→L+3(3.1), H→L+1(11.2)                                                        |
|                     | 4    | 3.9889      | H-5→L+2(2.2), H-4→L+4(2.3), H-2→L(10.5), H-2→L+1(7.9), H-2→L+2(2.9), H-1→L(19.0), H-1→L+1(16.9), H-1→L+3(2.6), H→L(4.6), H→L+2(20.4)                     |
|                     | 5    | 4.1778      | H-4→L (6.4), H-4→L+1 (9.0), H-3→L (3.4), H-3→L+4 (2.5), H-2→L+1 (2.7), H-2→L+2 (3.8), H-2→L+3 (7.0), H-1→L+4 (2.5), H→L+1(12.8), H→L+3(4.9), H→L+4(8.5), |

**Table S6.** The singlet and triplet excited state transition configurations of **5** dimer revealed by TD-DFT calculations. The matched excited states that contain the same orbital transition components of  $S_1$  and  $|S_1-T_n| < 0.3$  eV were highlighted in red.

| <b>5</b> (dimer) | n-th | Energy (eV) | Transition configuration (%)                                                       |
|------------------|------|-------------|------------------------------------------------------------------------------------|
| $S_n$            | 1    | 3.7333      | H-2→L+1(2.7), H-1→L(36.1), H-1→L+1(10.0), H→L(22.4), H→L+1(23.5)                   |
|                  | 1    | 2.6252      | H-2→L(2.2), H-1→L(65.7), H-1→L+1(10.0), H→L+1(6.8)                                 |
|                  | 2    | 2.6716      | H-4→L+1(3.2), H-2→L+1(7.0), H-1→L+1(2.2), H→L (10.0), H→L+1(63.6)                  |
|                  | 3    | 3.2916      | H-4→L+3(2.1), H-3→L+1(18.8), H-2→L(17.1), H-2→L+1(24.2), H-2→L+3(5.4), H→L+3(6.7), |
|                  | 4    | 3.3217      | H-5→L(2.8), H-5→L+2(2.2), H-3→L(34.1), H-3→L+2(6.4), H-2→L(9.5), H-2→L+1(11.1), H- |

|                |        |                                                                                                                                 |                                                                                                                                                                                                                               |
|----------------|--------|---------------------------------------------------------------------------------------------------------------------------------|-------------------------------------------------------------------------------------------------------------------------------------------------------------------------------------------------------------------------------|
| T <sub>n</sub> |        |                                                                                                                                 | 2→L+2(5.0), H-1→L+2(6.8),                                                                                                                                                                                                     |
|                | 5      | 3.6426                                                                                                                          | H-6→L+1(6.7), H-4→L(8.9), H-4→L+1(37.2), H-4→L+7(2.0), H-3→L+1(4.7), H-3→L+3(2.4), H-2→L+3(4.3), <b>H→L(2.1)</b> , H→L+2(2.2), H→L+3(9.3)                                                                                     |
|                | 6      | 3.669                                                                                                                           | H-7→L(4.4), H-5→L(44.5), H-5→L+1(6.9), H-5→L+6(2.9), H-3→L(3.3), H-3→L+2(5.9), H-2→L+2(3.9), H-1→L+1(9.0)                                                                                                                     |
|                | 7      | 3.9431                                                                                                                          | H-5→L(3.3), H-5→L+2(2.1), H-4→L+1(2.8), H-4→L+3(2.3), H-4→L+5(2.7), H-3→L(2.4), H-3→L+2(7.7), H-2→L(8.1), <b>H-2→L+1(3.6)</b> , H-2→L+3(9.4), <b>H-1→L(5.2)</b> , H-1→L+4(5.1), <b>H→L(4.2)</b> , H→L+3(5.5), H→L+5(7.8)      |
|                | 8      | 3.9649                                                                                                                          | H-5→L(4.8), H-5→L+4(2.1), H-4→L+1(4.4), H-4→L+3(2.1), H-3→L(5.4), H-3→L+2(3.7), H-3→L+3(3.6), H-2→L(2.6), <b>H-2→L+1(11.4)</b> , H-2→L+2(7.9), <b>H-1→L(3.5)</b> , H-1→L+2(2.3), H-1→L+4(6.8), <b>H→L+1(5.0)</b> , H→L+5(7.5) |
| 9              | 4.1579 | H-6→L(6.7), H-6→L+1(13.2), H-4→L+1(2.5), H-4→L+7(2.1), H-2→L(2.5), H-2→L+5(5.6), H→L(10.5), H→L+2(4.3), H→L+3(17.6), H→L+4(2.6) |                                                                                                                                                                                                                               |

**Table S7.** The singlet and triplet excited state transition configurations of isolated **5'** revealed by TD-DFT calculations. The matched excited states that contain the same orbital transition components of S<sub>1</sub> and |S<sub>1</sub>-T<sub>n</sub>| < 0.3 eV were highlighted in red.

| <b>5'</b> (Isolated) | n-th | Energy (eV) | Transition configuration (%)                                                                                                             |
|----------------------|------|-------------|------------------------------------------------------------------------------------------------------------------------------------------|
| S <sub>n</sub>       | 1    | 3.9054      | <b>H-1→L+1(5.9), H→L(92.3)</b>                                                                                                           |
| T <sub>n</sub>       | 1    | 2.6463      | H-3→L+3 (2.2), H-2→L(3.2), H-1→L+1(5.4), H→L(82.2)                                                                                       |
|                      | 2    | 3.4906      | H-1→L(58.8), H→L+1(29.6)                                                                                                                 |
|                      | 3    | 3.5683      | H-5→L+6 (2.7), H-3→L (5.2), H-2→L(11.9), H-2→L+2 (36.0), H-1→L+1(5.7), H→L+2(27.0), H→L+3(5.4)                                           |
|                      | 4    | 3.8376      | H-1→L(30.2), H→L+1(60.4),                                                                                                                |
|                      | 5    | 4.0129      | H-4→L +4(2.3), H-3→L (2.5), H-3→L+2 (3.4), H-2→L (6.8), H-2→L+3 (2.7), <b>H-1→L+1 (58.0)</b> , H→L+3(6.5), H→L+2(12.9)                   |
|                      | 6    | 4.1589      | H-6→L (5.3), H-5→L+1 (2.5), H-2→L(17.6), H-2→L+2 (11.8), H-2→L+5(2.2), <b>H→L(3.9)</b> , H→L+2(5.8), H→L+3(25.9), H→L+5(2.9)             |
|                      | 7    | 4.1945      | H-4→L+2 (10.3), H-3→L+1 (2.9), H-3→L+4(2.3), H-2→L+1 (13.6), H-2→L+4(6.4), H-1→L(2.4), H-1→L+2(52.5), H→L+1(2.1)                         |
|                      | 8    | 4.4935      | H-6→L(4.2), H-4→L+1 (6.6), H-3→L+2(9.6), H-2→L (4.8), H-2→L+2(20.0), H-2→L+3(8.8), H-1→L+1(18.4), H-1→L+4(8.4), H→L+2 (12.9), H→L+5(5.0) |

**Table S8.** The singlet and triplet excited state transition configurations of dimer **5'** revealed by TD-DFT calculations. The matched excited states that contain the same orbital transition components of S<sub>1</sub>



and  $|S_1-T_n| < 0.3$  eV were highlighted in red.

| 5' (dimer) | n-th | Energy (eV) | Transition configuration (%)                                                                                                                                                                       |
|------------|------|-------------|----------------------------------------------------------------------------------------------------------------------------------------------------------------------------------------------------|
| $S_n$      | 1    | 3.5649      | H-1→L(28.3), H-1→L+1(6.5), H→L(42.9),<br>H→L+1(17.7)                                                                                                                                               |
| $T_n$      | 1    | 2.2540      | H-1→L(27.3), H-1→L+1(13.1), H→L(37.1),<br>H→L+1(9.3)                                                                                                                                               |
|            | 2    | 2.2656      | H-2→L+4(2.2), H-1→L(13.7), H-1→L+1(25.2),<br>H→L(10.7), H→L+1(37.0)                                                                                                                                |
|            | 3    | 3.3375      | H-3→L (5.7), H-3→L+1 (18.1), H-2→L(22.4), H-<br>2→L+1 (8.7), H-1→L+4(3.2), H-1→L+5(5.1),<br>H→L+2(2.3), H→L+2(7.1)                                                                                 |
|            | 4    | 3.3566      | H-3→L(30.2), H-2→L+1(27.0), H-1→L+4(27.0),<br>H→L+3(4.9), H→L+4(2.5), H→L+5(5.3)                                                                                                                   |
|            | 5    | 3.3880      | H-5→L +2(14.2), H-5→L+3 (4.3), H-4→L+1 (3.0),<br>H-4→L+3 (12.7), H-4→L+5 (5.0), H-3→L (4.2),<br>H-2→L+3 (4.7), H-2→L+4(2.6), H-1→L+2(9.2),<br>H→L+3(8.0), H→L+5(4.9)                               |
|            | 6    | 3.3897      | H-5→L+1 (2.3), H-5→L+3 (17.1), H-5→L+5(3.3),<br>H-4→L+2 (19.4), H-4→L+5(2.2), H-3→L+5(3.0),<br>H-2→L+4(5.2), H-1→L+3(8.5), H-1→L+5(2.2),<br>H→L+2(11.0)                                            |
|            | 7    | 3.6877      | H-3→L (6.5), H-2→L+1 (12.8), H-1→L(8.0), H-<br>1→L+2 (3.0), H-1→L+4(17.1), H-1→L+5(2.2),<br>H→L(2.0), H→L+1(6.6), H→L+3(4.4),<br>H→L+4(12.8), H→L+4(10.3)                                          |
|            | 8    | 3.7146      | H-3→L(5.9), H-3→L+1 (8.0), H-2→L(9.6), H-<br>1→L+1 (14.7), H-1→L+2(2.3), H-1→L+3(5.0), H-<br>1→L+4(3.3), H-1→L+5(14.6), H→L (2.2),<br>H→L+2(7.3), H→L+3(2.9), H→L+4(16.4),<br>H→L+5(7.2)           |
|            | 9    | 3.8248      | H-7→L(6.5), H-6→L(2.6), H-6→L+1(3.7), H-<br>3→L+2 (2.2), H-3→L+5(5.2), H-2→L+4(2.4), H-<br>1→L+1(2.8), H-1→L+2(9.8), H-1→L+6 (8.0),<br>H→L(2.6), H→L+3(8.6), H→L+5(2.3),<br>H→L+6(5.0), H→L+7(4.4) |
|            | 10   | 3.8433      | H-7→L+1(4.5), H-6→L(5.5), H-6→L+1(3.1), H-<br>2→L+4(12.4), H-1→L+2(4.3), H-1→L+3(7.0), H-<br>1→L+7(7.4), H→L+2(11.4), H→L+5 (4.3),<br>H→L+6(5.4), H→L+7 (3.5)                                      |
|            | 11   | 3.8940      | H-5→L+1(9.1), H-4→L(11.0), H-4→L+1(7.9), H-<br>3→L+1(2.4), H-2→L(3.0), H-2→L+4(11.3), H-<br>1→L+7(4.9), H→L(3.3), H→L+6 (3.1),<br>H→L+7(5.3)                                                       |

## Reference

- S1 G. M. Sheldrick. SHELXS-90/96, Program for Structure Solution, *Acta. Crystallogr. Sect. A* **1990**, 46, 467.
- S2 F. Neese. Software update: the ORCA program system, version 4.0, doi:10.1002/wcms.1327

- S3** (a) A. D. Becke. "Density-functional thermochemistry. III. The role of exact exchange," *J. Chem. Phys.*, 98 (1993) 5648-52; (b) C. Adamo and V. Barone, "Toward reliable density functional methods without adjustable parameters: The PBE0 model," *J. Chem. Phys.*, 110 (1999), 6158-69.
- S4** (a) Y.-Y. Chen, X.-J. Zhang, H.-M. Yuan, W.-T. Wei, M. Yan. *Chem. Commun.*, **2013**, 49, 10974; (b) H. N. Huang, Z. X. Pan, C. M. Cui, *Chem. Commun.*, **2016**, 52, 4227.

**Scanned NMR Spectra of All New Compounds**

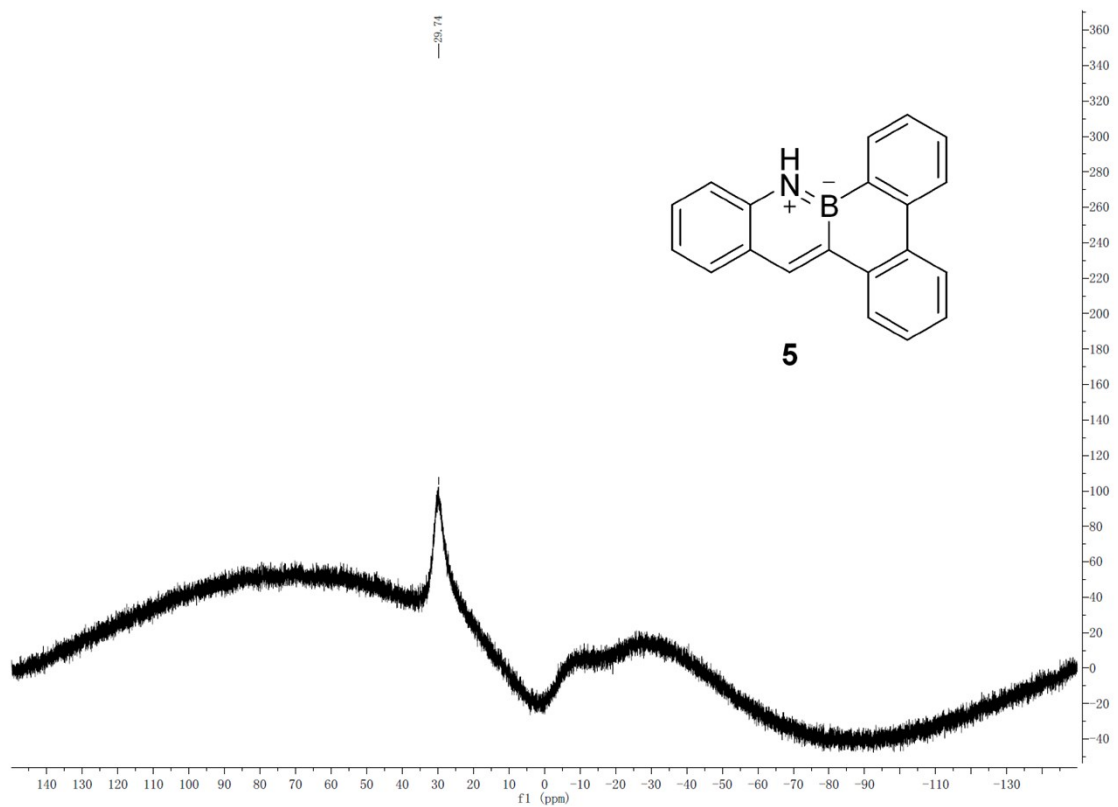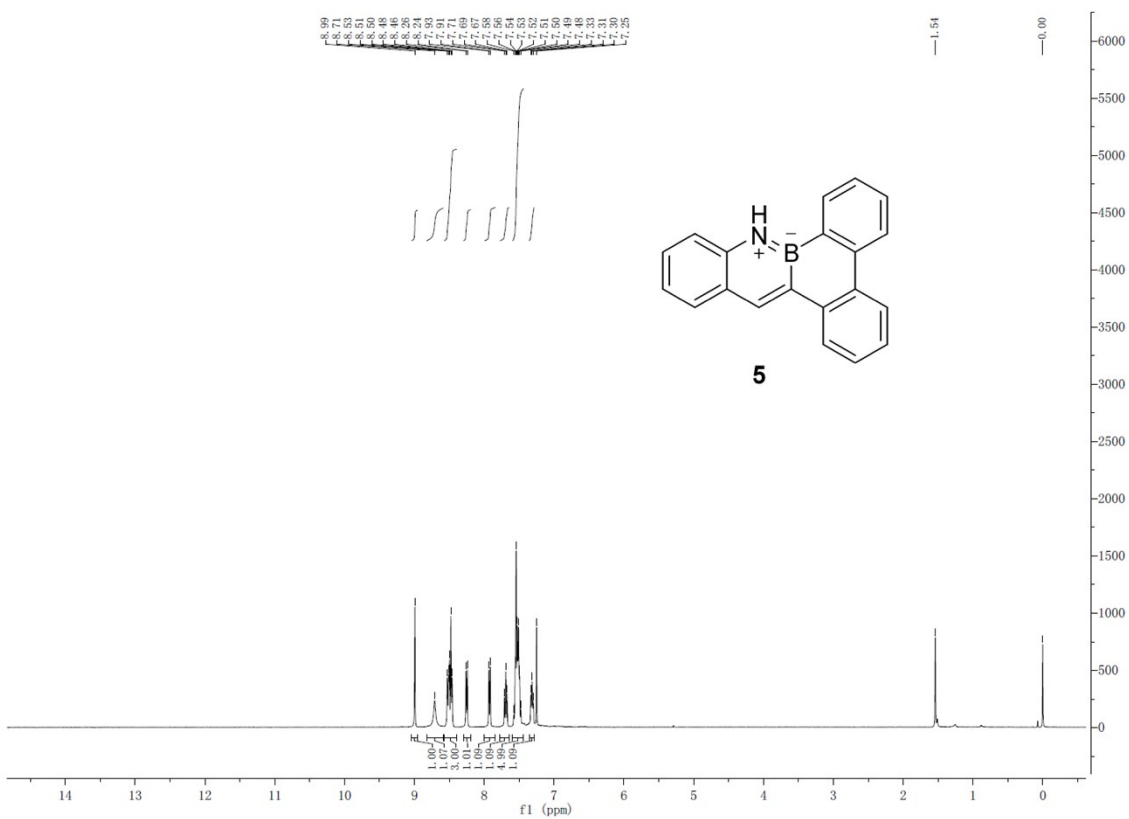

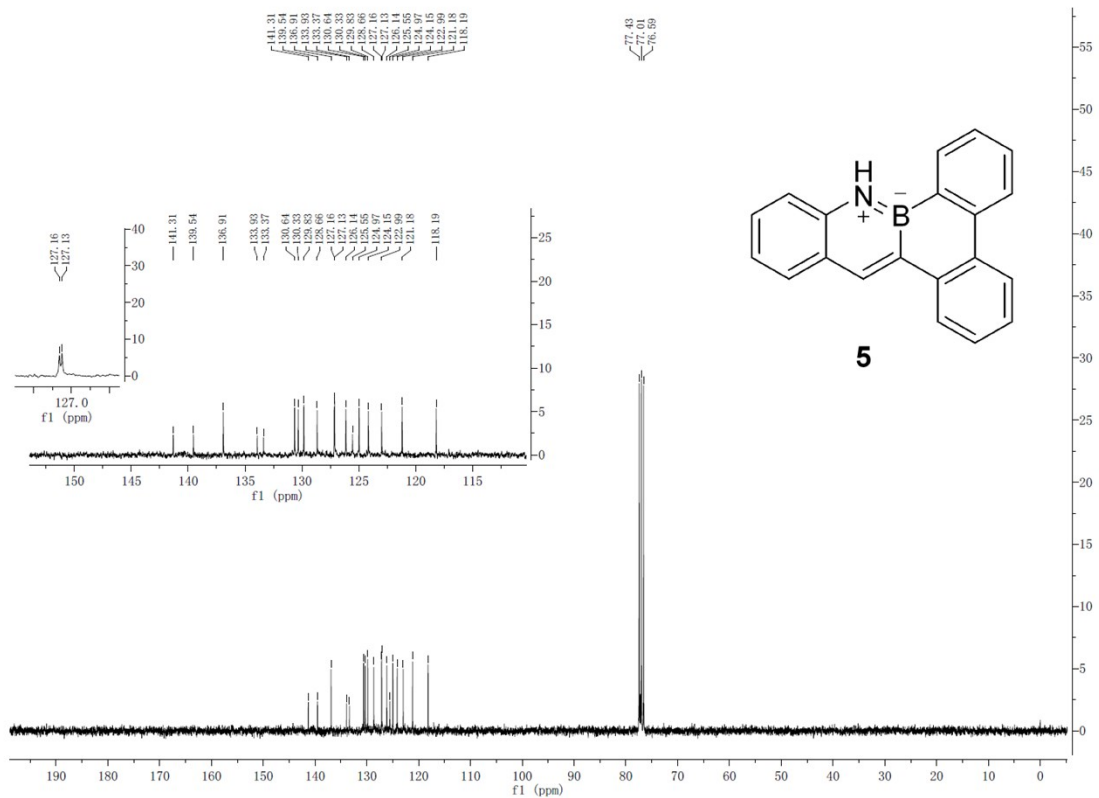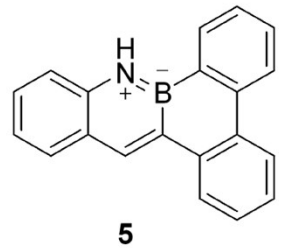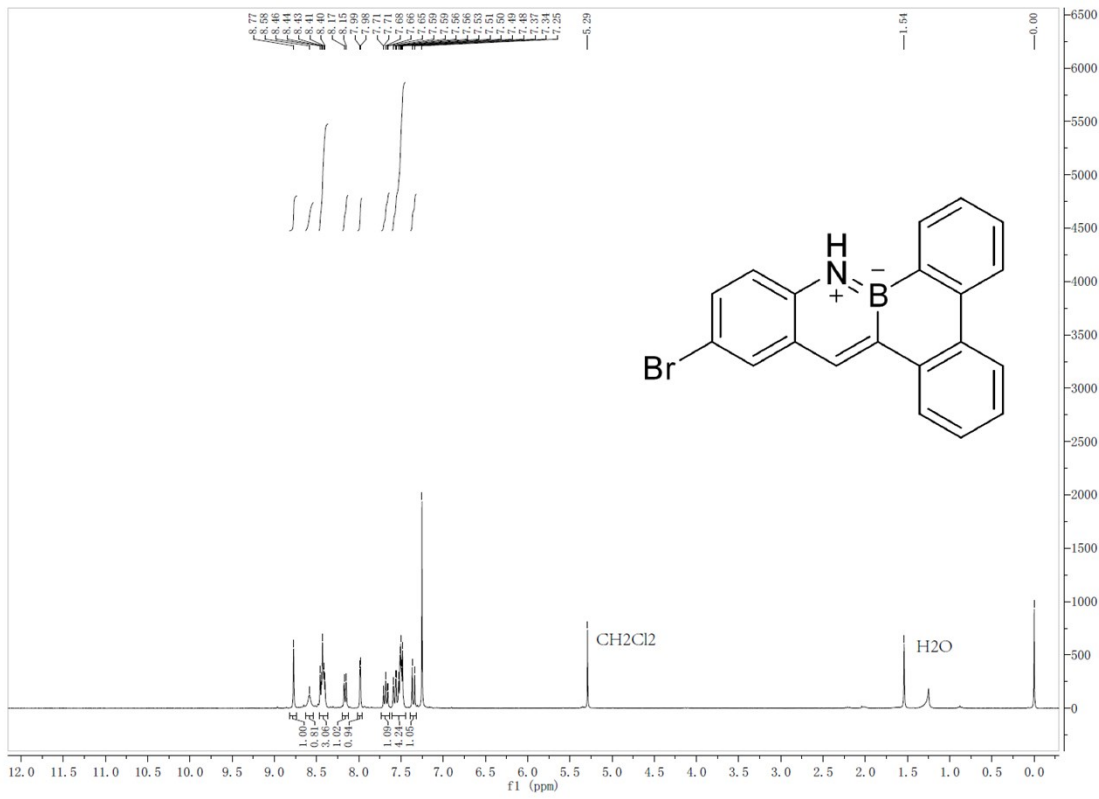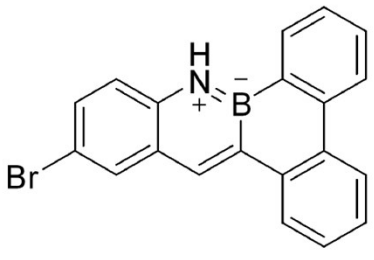

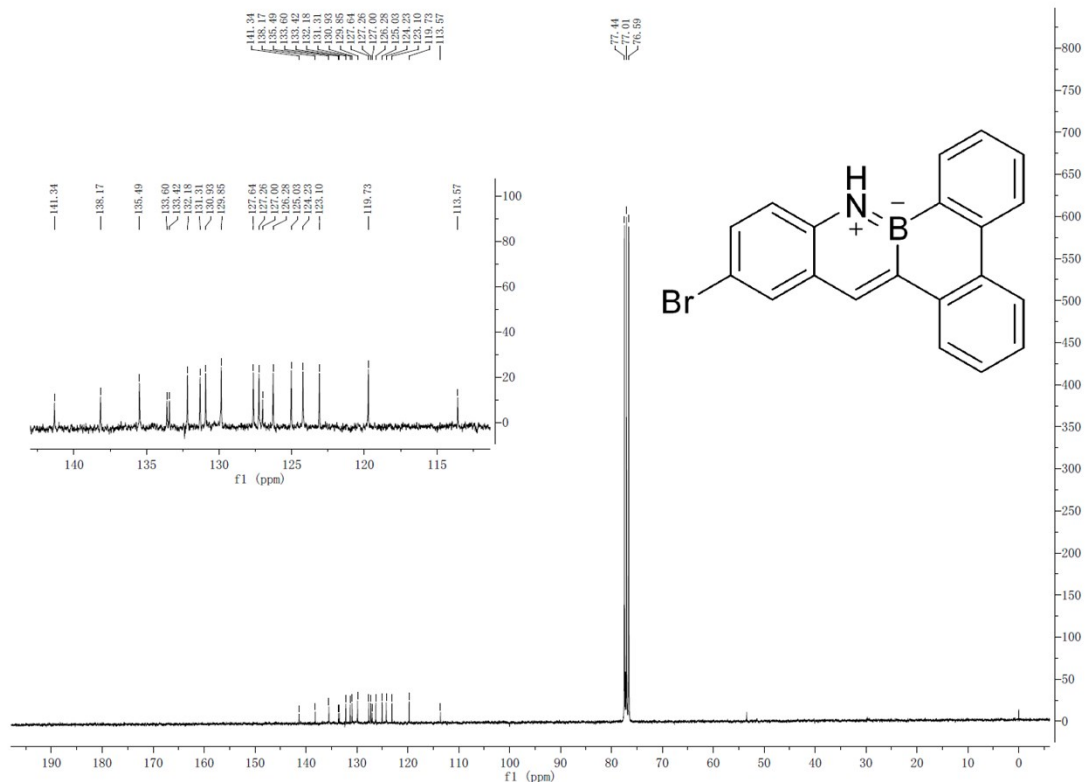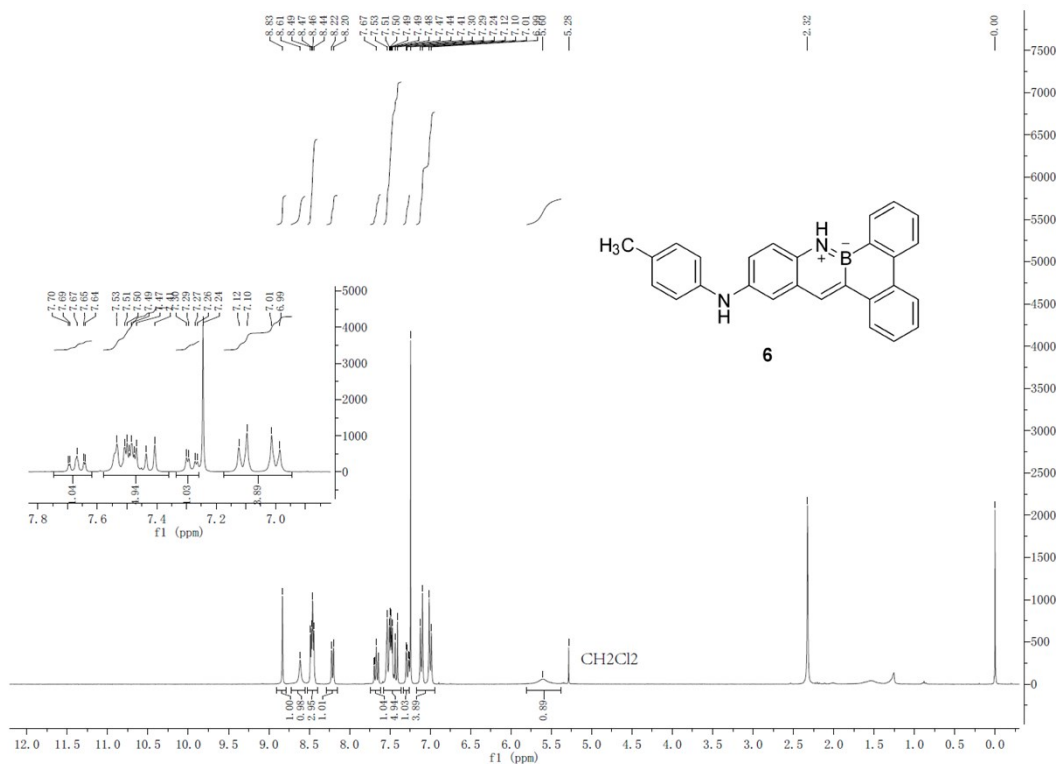

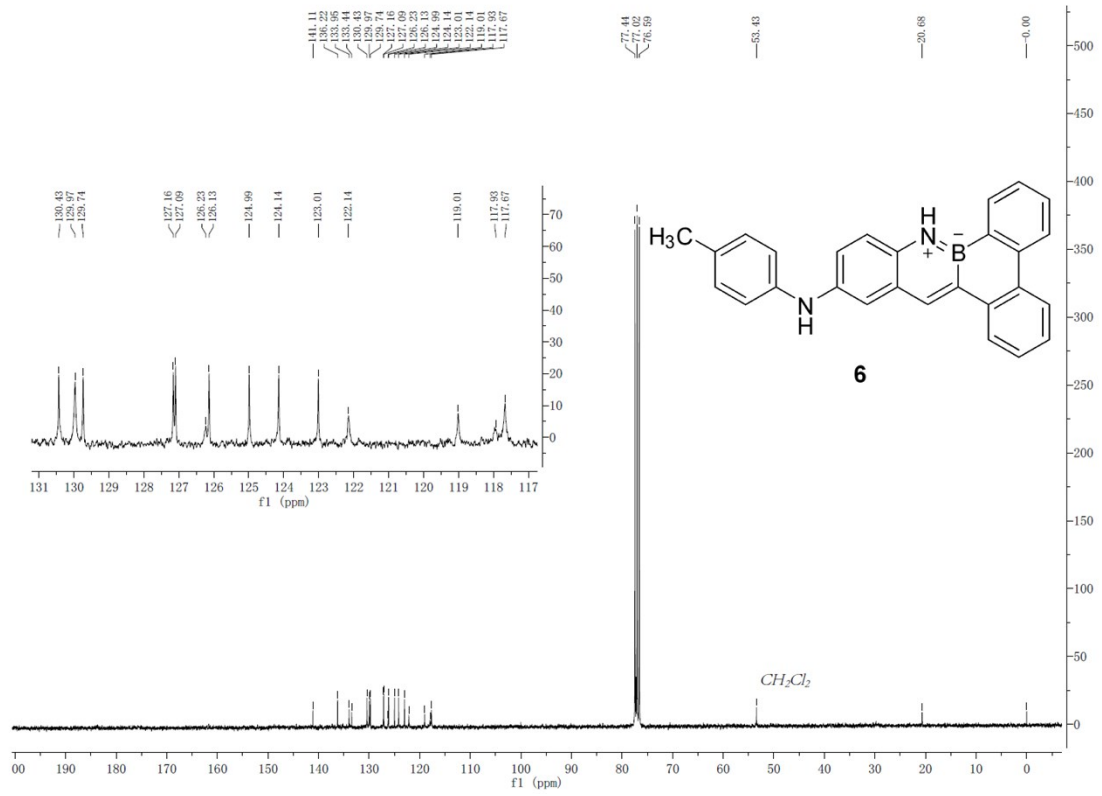

Supplement: d0ta06191c1.pdf [file d0ta06191c1.pdf]
